# Supplementary material for: Development, Validation, and Application of the LC-MS/MS Method for Determination of 4-Acetamidobenzoic Acid in Pharmacokinetic Pilot Studies in Pigs
Source: MDPI journal article supplement (doi:10.3390/molecules26154437), 2021-07-23
Supplement: s1 [file s1]

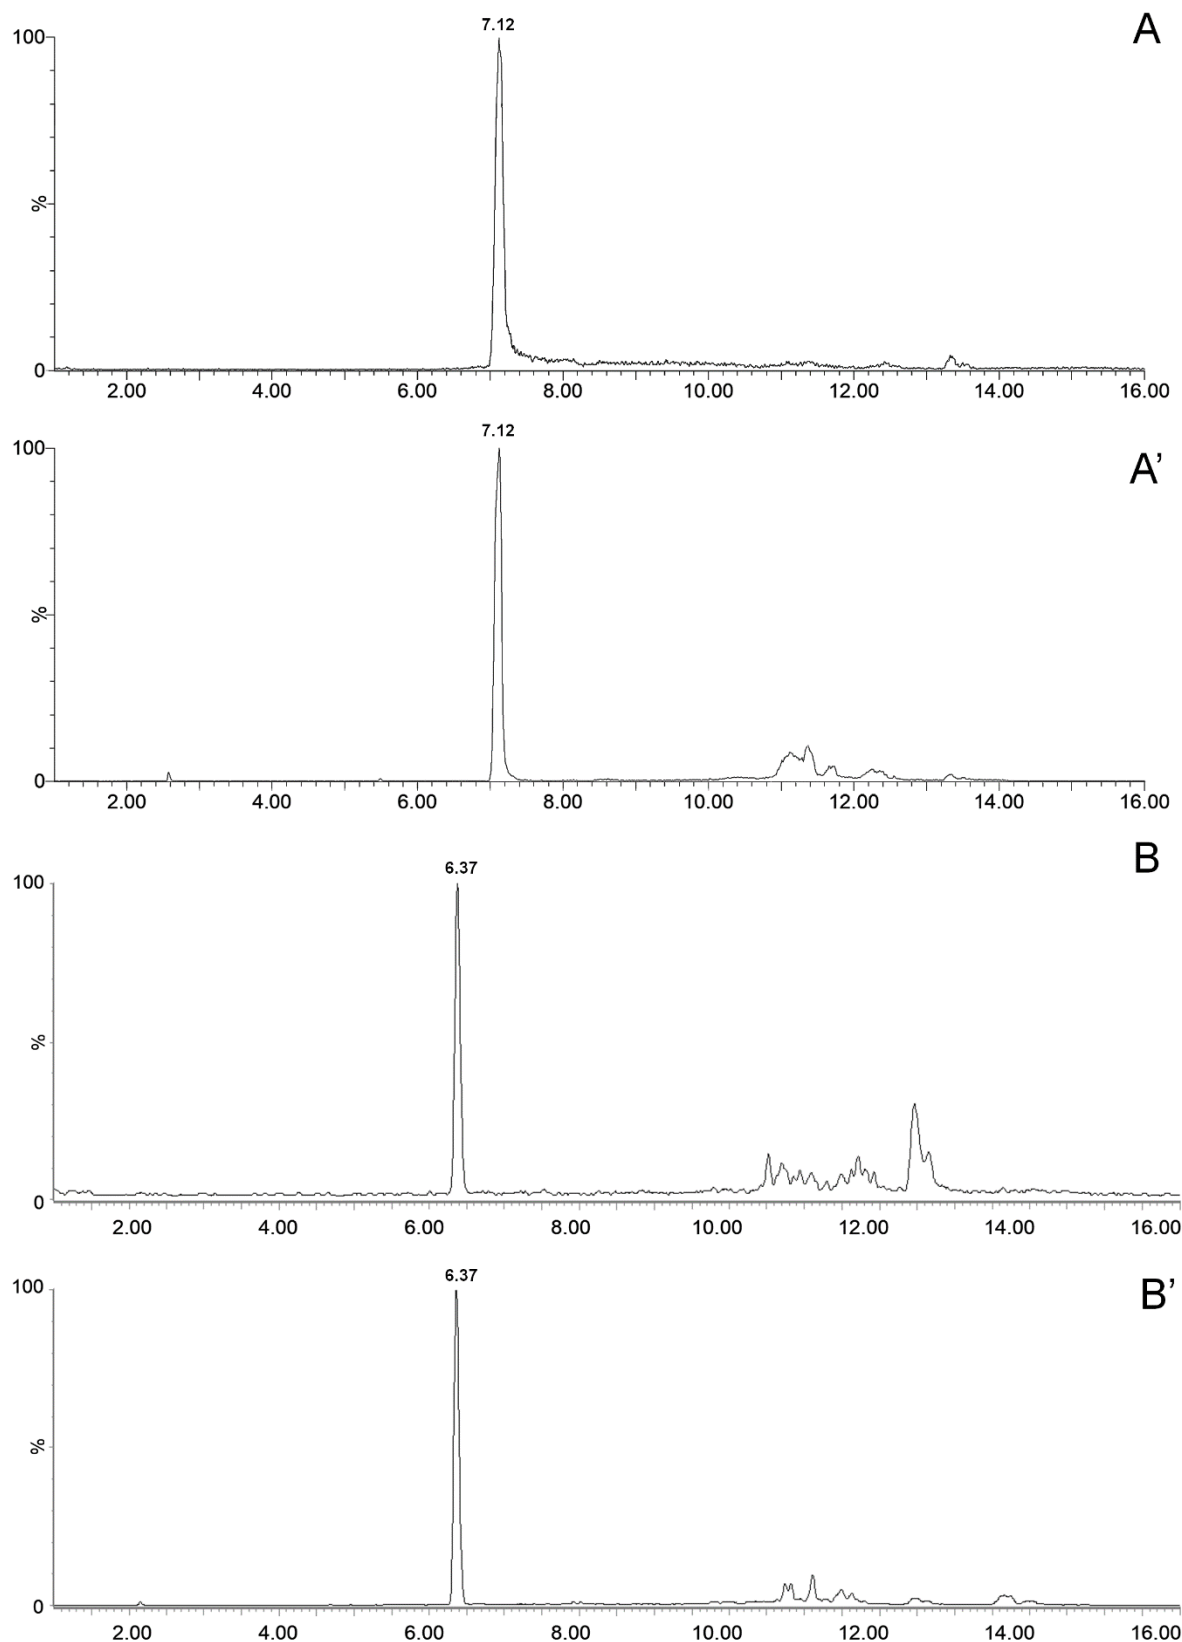

**Supplementary Figure S1.** Chromatograms from an Atlantis T3 analytical column (150 × 3 mm with 3  $\mu$ m particle size) – A, A', and from an XBridge column (150 × 3 mm with 3.5  $\mu$ m particle size) – B, B' (A,B – 4-acetamidobenzoic acid; A',B' – deuterium labeled 4-acetamidobenzoic acid as an internal standard).

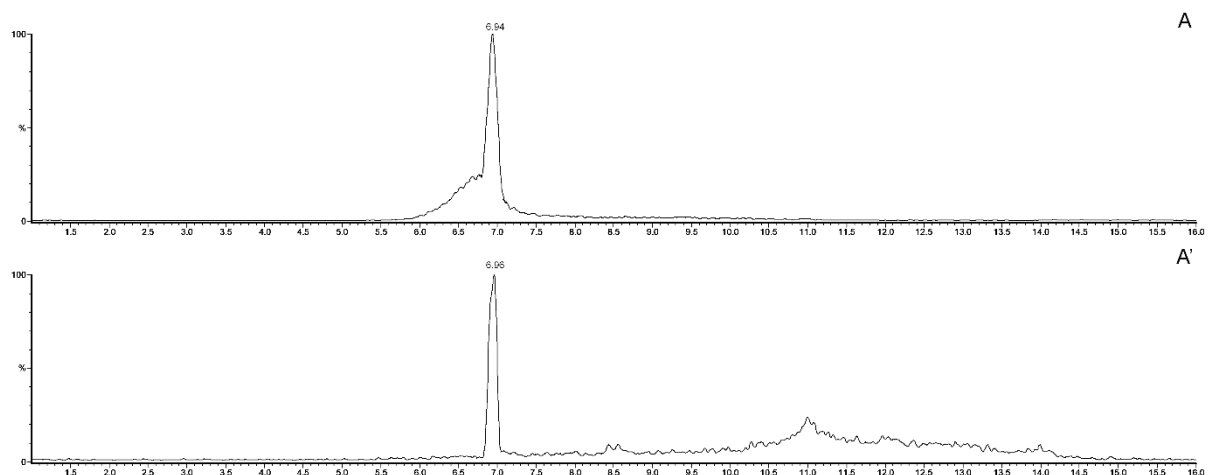

**Supplementary Figure S2.** Chromatograms obtained from initial phase comprised of 0.2% formic acid in water with 0.2% formic acid in acetonitrile at a ratio of 9:1 v/v with the column temperature set at 35°C (A – unidentified background noise; A' - asymmetrical peak at the top).

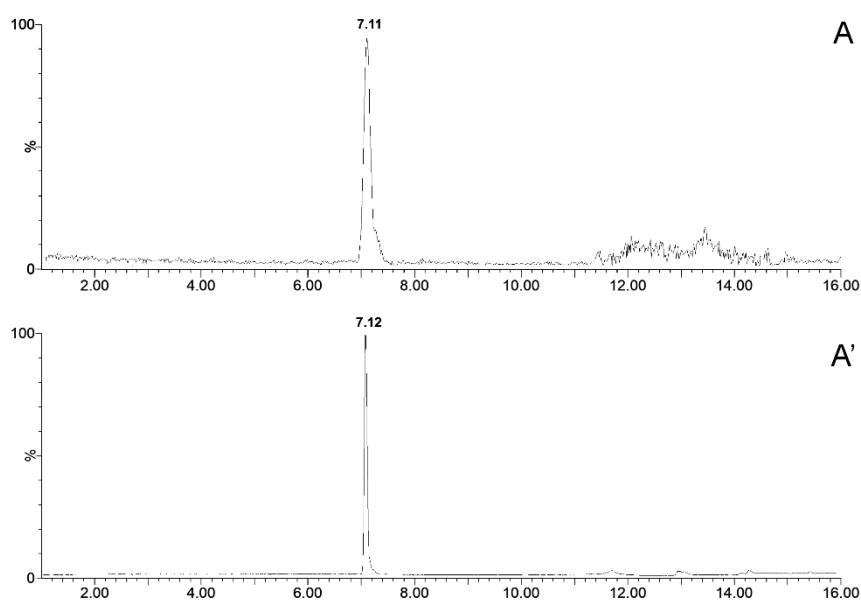

**Supplementary Figure S3.** Chromatograms obtained at the lowest limit of quantitation, 10 ng/mL (A – 4-acetamidobenzoic acid; A' – deuterium labeled 4-acetamidobenzoic acid as an internal standard).

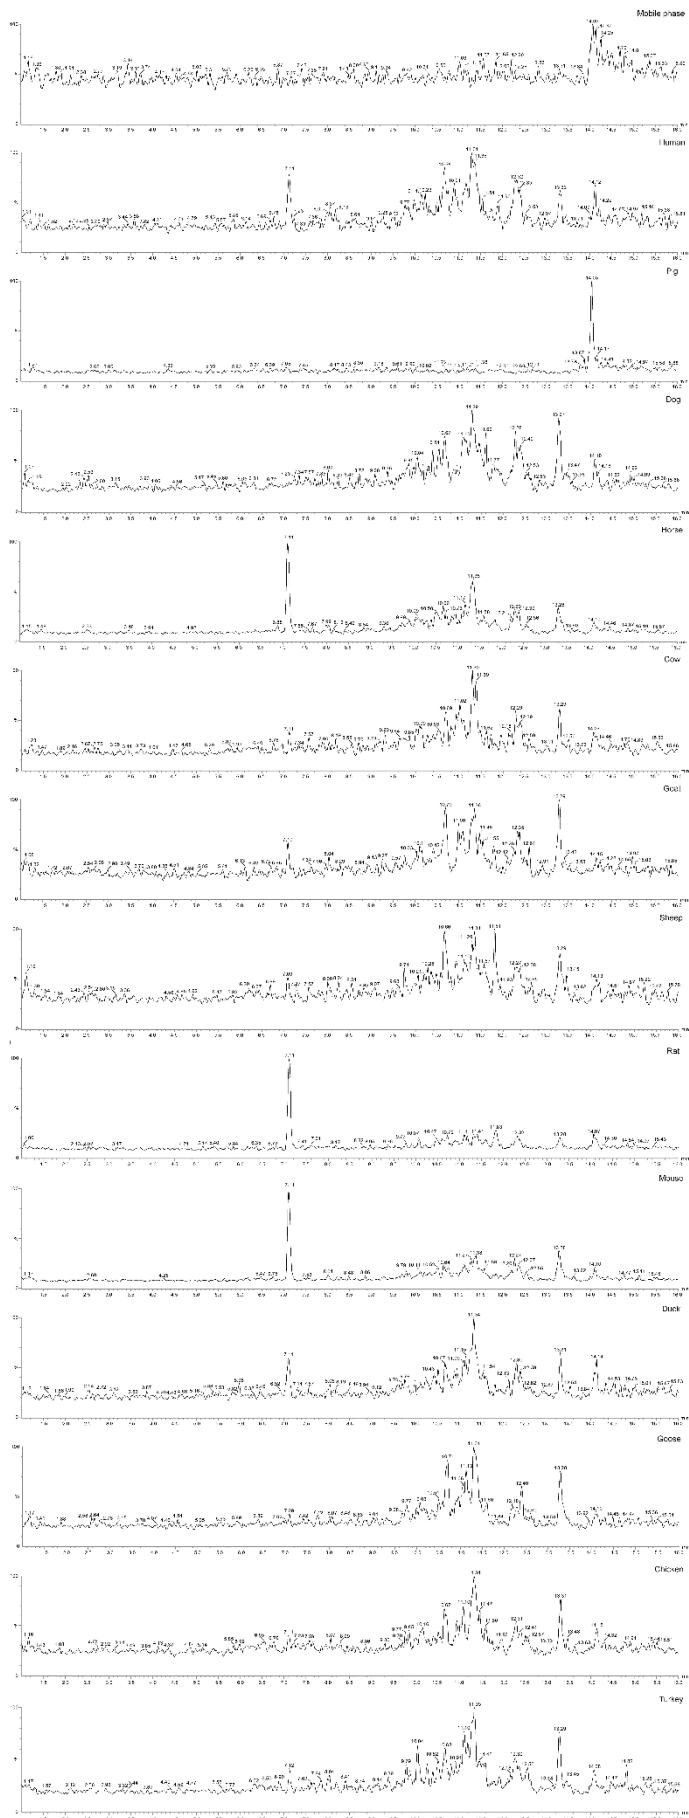

**Supplementary Figure S4.** Chromatograms from a selectivity/specificity test. The signal-to-noise ratios of all identified peaks are lower than 10:1.

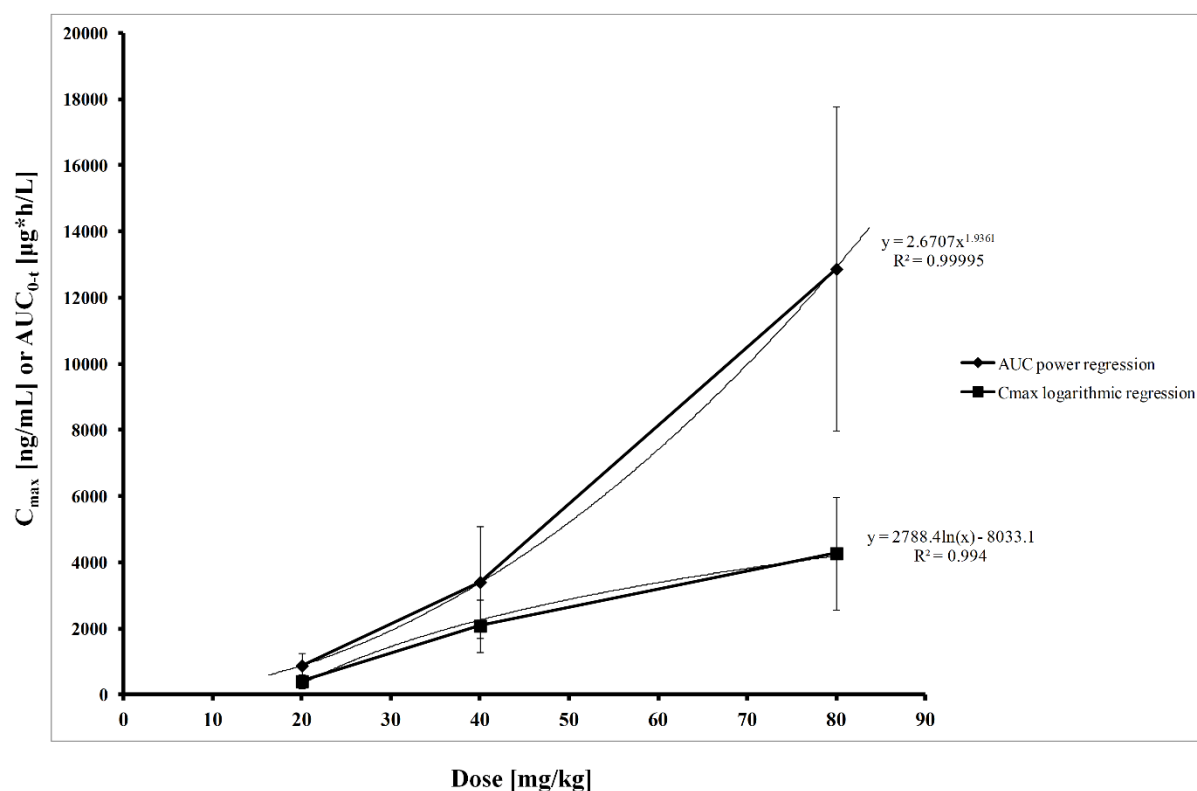

**Supplementary Figure S5.** Power regression with the coefficient of determination ( $R^2$ ) of the area under the concentration-time curve calculated from 0 to t ( $AUC_{0-t}$ ) and logarithmic regression with the coefficient of determination ( $R^2$ ) of the maximum plasma concentration ( $C_{\max}$ ) of 4-acetamidobenzoic acid after oral administration to pigs at doses of 20, 40 and 80 mg/kg BW (n=3).

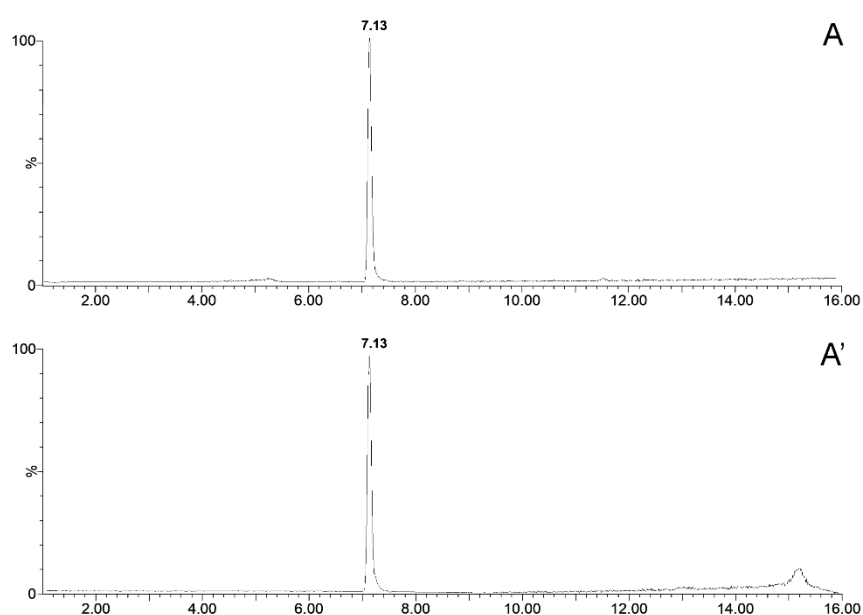

**Supplementary Figure S6.** Chromatograms obtained from the pharmacokinetics study: A – 4-acetamidobenzoic acid; A' – deuterium labeled 4-acetamidobenzoic acid as an internal standard.

**Supplementary Table S1.** Matrix effect and total recovery results of PAcBA and IS using three different extractants. Each quality control point is the mean value calculated from six replicates.

| QC   | Acetonitrile |       |               |       | 1,2 Dichloroethane |       |               |       | Ethyl Acetate |       |               |       |
|------|--------------|-------|---------------|-------|--------------------|-------|---------------|-------|---------------|-------|---------------|-------|
|      | Recovery     |       | Matrix effect |       | Recovery           |       | Matrix effect |       | Recovery      |       | Matrix effect |       |
|      | PAcBA        | IS    | PAcBA         | IS    | PAcBA              | IS    | PAcBA         | IS    | PAcBA         | IS    | PAcBA         | IS    |
| LQC  | 88.46        | 84.90 | -3.36         | -5.95 | 90.44              | 93.37 | 14.96         | 11.65 | 94.80         | 95.19 | 15.54         | 12.42 |
| IQC  | 86.27        | 87.73 | -11.29        | -5.29 | 94.42              | 98.95 | 13.11         | 15.93 | 91.73         | 90.07 | 14.14         | 11.96 |
| MQC  | 88.10        | 87.55 | -1.69         | -6.12 | 90.43              | 94.44 | 10.95         | 11.30 | 96.49         | 95.97 | 11.77         | 17.80 |
| HQC  | 92.47        | 92.20 | -3.73         | -5.44 | 95.70              | 98.62 | 10.55         | 11.18 | 98.58         | 94.98 | 10.23         | 11.15 |
| Mean | 88.83        | 88.09 | -5.02         | -5.70 | 92.75              | 96.35 | 12.39         | 12.52 | 95.41         | 94.06 | 12.92         | 13.33 |
| SD   | 2.61         | 3.02  | 4.27          | 0.39  | 2.72               | 2.85  | 2.04          | 2.28  | 2.89          | 2.69  | 2.37          | 3.02  |

QC – quality control point; LQC – low concentration quality control; IQC – intermediate concentration quality control; MQC – medium concentration quality control; HQC – high concentration quality control; PAcBA – 4-acetamidobenzoic acid; IS – internal standard (deuterium labeled 4-acetamidobenzoic acid).

**Supplementary Table S2.** Linearity results.

| Linearity parameters                             | Calibration curve                                        |                      |                      |                      |                      |
|--------------------------------------------------|----------------------------------------------------------|----------------------|----------------------|----------------------|----------------------|
|                                                  | I                                                        | II                   | III                  | IV                   | Mean <sup>a</sup>    |
| Range <sup>b</sup>                               | 10, 25, 50, 100, 250, 500, 1000, 2500, 5000, 7500, 10000 |                      |                      |                      |                      |
| Number of calibration points above 15% deviation | 1                                                        | 2                    | 2                    | 2                    | 2                    |
| r <sup>2</sup>                                   | 0.9992                                                   | 0.9992               | 0.9975               | 0.9988               | 0.9990               |
| Regression equation                              | y = 1.0056x + 4.3222                                     | y = 0.9973x + 2.1339 | y = 0.9974x + 6.2388 | y = 1.0025x + 11.967 | y = 1.0007x + 6.1655 |
| Mean relative residuals (%)                      | 6.92                                                     | 2.69                 | 7.22                 | 11.46                | 7.53                 |
| SD of relative residuals                         | 0.01                                                     | 0.01                 | 0.01                 | 0.02                 | 0.01                 |

<sup>a</sup> the curve created from mean concentrations.

<sup>b</sup> in ng ml<sup>-1</sup>.

**Supplementary Table S3.** Precision and accuracy results.

|                                 |                                          | <b>LLOQ</b> | <b>LQC</b>   | <b>IQC</b>     | <b>MQC</b>       | <b>HQC</b>        |
|---------------------------------|------------------------------------------|-------------|--------------|----------------|------------------|-------------------|
|                                 | <b>Nominal concentration<sup>a</sup></b> | 10.0        | 50.0         | 500.0          | 5000.0           | 10000.0           |
| Intra-day<br>n=6; 3 repetitions | Mean concentration <sup>a</sup> ±SD      | 10.0 ± 0.52 | 49.98 ± 1.82 | 500.0 ± 30.84  | 4999.98 ± 243.42 | 10000.02 ± 281.34 |
|                                 | Precision (%)                            | 5.22        | 3.64         | 6.17           | 4.87             | 2.81              |
|                                 | Accuracy (%)                             | 95.67       | 97.7         | 96.09          | 96.07            | 97.69             |
|                                 | Mean concentration <sup>a</sup> ±SD      | 10.0 ± 1.37 | 49.98 ± 5.68 | 500.0 ± 22.34  | 5000.0 ± 172.25  | 10000.02 ± 465.29 |
|                                 | Precision (%)                            | 13.71       | 11.37        | 4.45           | 3.45             | 4.65              |
|                                 | Accuracy (%)                             | 89.0        | 91.43        | 96.39          | 97.26            | 96.76             |
|                                 | Mean concentration <sup>a</sup> ±SD      | 10.0 ± 1.38 | 50.0 ± 2.65  | 500.02 ± 15.51 | 5000.02 ± 105.63 | 10000.0 ± 304.15  |
|                                 | Precision (%)                            | 13.81       | 5.30         | 3.10           | 2.11             | 3.04              |
|                                 | Accuracy (%)                             | 89.0        | 95.53        | 97.62          | 98.57            | 97.51             |
|                                 | Mean concentration <sup>a</sup> ±SD      | 10.0 ± 1.09 | 49.98 ± 3.54 | 500.01 ± 22.27 | 5000.0 ± 171.57  | 10000.01 ± 337.88 |
| Inter-day<br>n=18               | Precision (%)                            | 10.93       | 7.08         | 4.45           | 3.43             | 3.38              |
|                                 | Accuracy (%)                             | 91.22       | 94.89        | 96.7           | 97.3             | 97.32             |

LQC – low-concentration quality control (50 ng ml<sup>-1</sup>); IQC – intermediate-concentration quality control (500 ng ml<sup>-1</sup>); MQC – medium-concentration quality control (5000 ng ml<sup>-1</sup>); HQC – high-concentration quality control (10000 ng ml<sup>-1</sup>).

<sup>a</sup> in ng ml<sup>-1</sup>.

**Supplementary Table S4.** The lowest limit of quantitation (LLOQ) and limit of detection (LOD) results.

LLOQ – the lowest limit of quantitation; LOD – limit of detection; S/N – signal to noise ratio.

| PAcBA<br>nominal<br>concentration <sup>a</sup> | No. | Repetition                 |       |                            |       |                            |       |
|------------------------------------------------|-----|----------------------------|-------|----------------------------|-------|----------------------------|-------|
|                                                |     | I                          |       | II                         |       | III                        |       |
|                                                |     | concentration <sup>a</sup> | S/N   | concentration <sup>a</sup> | S/N   | concentration <sup>a</sup> | S/N   |
| 10.0                                           | 1   | 10.60                      | 8.35  | 8.50                       | 15.17 | 9.20                       | 11.91 |
|                                                | 2   | 9.30                       | 16.74 | 8.90                       | 12.56 | 8.60                       | 17.66 |
|                                                | 3   | 9.50                       | 13.36 | 10.60                      | 11.18 | 12.30                      | 22.23 |
|                                                | 4   | 10.40                      | 17.18 | 10.50                      | 14.35 | 9.60                       | 17.14 |
|                                                | 5   | 9.90                       | 13.32 | 9.30                       | 11.92 | 9.30                       | 22.95 |
|                                                | 6   | 10.30                      | 15.86 | 12.20                      | 11.33 | 11.00                      | 29.21 |
| Mean                                           |     | 10.00                      | 14.13 | 10.00                      | 12.75 | 10.00                      | 20.18 |
| SD                                             |     | 0.52                       | 3.28  | 1.37                       | 1.65  | 1.38                       | 5.96  |
| LOD <sup>b</sup>                               |     | 1.56                       | 9.84  | 4.11                       | 4.96  | 4.14                       | 17.87 |
|                                                |     | concentration <sup>a</sup> |       |                            |       | S/N                        |       |
| LLOQ overall mean<br>n=18                      |     | 10.00                      |       |                            |       | 15.69                      |       |
| LLOQ overall SD<br>n=18                        |     | 1.09                       |       |                            |       | 3.95                       |       |
| LOD overall mean<br>n=18                       |     | 3.27                       |       |                            |       | 10.89                      |       |
| LOD overall SD<br>n=18                         |     | 1.48                       |       |                            |       | 6.52                       |       |

<sup>a</sup>ng ml<sup>-1</sup>

<sup>b</sup>  $LOD = 3 \times SD_{LLOQ \text{ or } S/N_{mean}}$

**Supplementary Table S5.** Carry over test results of 4-acetamidobenzoic acid (PAcBA) and deuterium labeled (d3) 4-acetamidobenzoic acid (internal standard; IS).



| Sample |       | Peak area of<br>PAcBA | Peak area of<br>mobile phase | Peak area of<br>PAcBA LLOQ | Carry over<br>(%) |
|--------|-------|-----------------------|------------------------------|----------------------------|-------------------|
| 1      | PAcBA | 192167.07             | 0                            |                            | 0                 |
|        | IS    | 24805.0               | 0                            |                            | 0                 |
| 2      | PAcBA | 197217.39             | 12.42                        |                            | 9.29              |
|        | IS    | 24245.05              | 0                            |                            | 0                 |
| 3      | PAcBA | 195457.67             | 0                            |                            | 0                 |
|        | IS    | 24488.53              | 0                            | 133.74                     | 0                 |
| 4      | PAcBA | 192124.78             | 0                            |                            | 0                 |
|        | IS    | 24575.0               | 0                            |                            | 0                 |
| 5      | PAcBA | 191073.66             | 14.09                        |                            | 10.54             |
|        | IS    | 24660.18              | 0                            |                            | 0                 |
| 6      | PAcBA | 194821.64             | 11.12                        |                            | 8.32              |
|        | IS    | 24833.93              | 0                            |                            | 0                 |
| Mean   | PAcBA | 193810.4              | 6.27                         | -                          | 4.69              |
|        | IS    | 24601.28              | 0                            | -                          | 0                 |
| SD     | PAcBA | 2382.238              | 6.93                         | -                          | 5.19              |
|        | IS    | 218.815               | 0                            | -                          | 0                 |

LLOQ – the lowest limit of quantitation.

**Supplementary Table S6.** Feed composition.

| Basic composition  | Unit | Contents |
|--------------------|------|----------|
| Crude protein      | %    | 16.6     |
| Crude fat          | %    | 3.7      |
| Crude fiber        | %    | 4.6      |
| Lysine             | %    | 1.06     |
| Methionine         | %    | 0.33     |
| Treonine           | %    | 0.69     |
| Tryptophan         | %    | 0.18     |
| Calcium            | g/kg | 5.6      |
| Phosphorus         | g/kg | 4.3      |
| Sodium             | g/kg | 1.9      |
| Vit. A             | UI   | 6500     |
| Vit D <sub>3</sub> | UI   | 2000     |
| Vit E              | UI   | 65       |
